1 **Assessment of the zoonotic potential of the ruminant-associated**  
2 **influenza D virus**

3

4 Melle Holwerda<sup>1,2,3</sup>, Jasmine Portmann<sup>1,2</sup>, Hanspeter Stalder<sup>1,2</sup> and Ronald Dijkman<sup>1,2\*</sup>

5

6 <sup>1</sup> Institute of Virology and Immunology, Bern & Mittelhäusern, Switzerland.

7 <sup>2</sup> Department of Infectious diseases and Pathobiology, Vetsuisse Faculty, University of Bern, Bern,  
8 Switzerland.

9 <sup>3</sup> Graduate School for Cellular and Biomedical Sciences, University of Bern, Switzerland.

10

11

12

13

14

15

16

17

18

19

20

21

22

23

24

25

26

27

28

29

30

31 \*Correspondence: Prof. Dr. Ronald Dijkman, Institute of Virology and Immunology, Department of  
32 infectious Diseases and Pathobiology, Vetsuisse Faculty, University of Bern, Länggassstrasse 122,  
33 3012 Bern, Switzerland. Tel: +41 31 631 2259, Email: ronald.dijkman@vetsuisse.unibe.ch.

34 **Abstract**

35 Influenza viruses are notorious pathogens that frequently cross the species barrier with often severe  
36 consequences for both animal and human health. In 2011, a novel member of the *Orthomyxoviridae*  
37 family, Influenza D virus (IDV), was identified in the respiratory tract of pigs with influenza-like  
38 symptoms and subsequently also in cattle, a species that previously never was associated with  
39 influenza virus infection. Epidemiological surveys among livestock demonstrated that IDV is worldwide  
40 distributed among ruminants, but the most striking observation is the detection of IDV-directed  
41 antibodies among humans with occupational exposure to livestock. As a first step toward identifying  
42 the zoonotic potential of the newly emerging IDV we determined the replication kinetics and cell  
43 tropism at the primary site of replication using an *in vitro* respiratory epithelium model of humans. The  
44 inoculation of IDV on human airway epithelial cell (hAEC) cultures revealed efficient replication kinetics  
45 and apical progeny virus release of IDV at different body temperatures. Intriguingly, the replication  
46 characteristics of IDV revealed many similarities to the human-associated Influenza C virus, including  
47 the predominant cell tropism for ciliated cells. Moreover, analysis of the host response during IDV  
48 infection revealed only a pronounced upregulation of Type III interferon (IFN) transcripts.  
49 Nevertheless, viral progeny virus is replication competent and can be efficiently sub-passaged in  
50 hAEC cultures from different donors. Highlighting, that there is no intrinsic impairment of IDV  
51 replication within the human respiratory epithelium and might explain why IDV-directed antibodies can  
52 be detected among humans with occupational exposure to livestock.

53

54 **Importance**

55 Influenza viruses are notorious pathogens that frequently cross the species barrier with often severe  
56 consequences for both animal and human health. In 2011, a novel member of the *Orthomyxoviridae*  
57 family, Influenza D virus (IDV), was identified among pigs with influenza-like symptoms and  
58 subsequently also in cattle. IDV infections in humans have not yet been described, although IDV-  
59 directed antibodies have been found among people with occupational exposure to livestock. This  
60 observation suggests a possible spillover from livestock to humans. Using an *in vitro* human  
61 respiratory epithelium model we demonstrate there is no inherent restriction for IDV to replicate within  
62 the human respiratory epithelium and this might explain why IDV-directed antibodies are detected  
63 among humans with occupational exposure to livestock.

64

## 65 Introduction

66 Since the initial discovery of Influenza D virus (IDV) in 2011, among swine with Influenza-like  
67 symptoms, knowledge about this new genus in the family of *Orthomyxoviridae* is increasing (1, 2).  
68 Epidemiological studies have shown that the virus has a worldwide distribution that can be divided into  
69 at least two distinct cocirculating lineages which reassort (3–10). Because of the high seroprevalence  
70 the proposed natural reservoir of IDV is cattle, which in an experimental setting is shown to cause a  
71 mild respiratory infection (11). In addition to cattle, virus specific-antibodies towards IDV have also  
72 been detected in swine, feral swine, equine, ovine, caprine and camelid species, suggesting a broad-  
73 host tropism for IDV (3, 9, 12, 13). However, the most striking observation is the detection of IDV-  
74 directed antibodies among humans with occupational exposure to livestock (14).

75 The hemagglutinin-esterase fusion (HEF) glycoprotein of IDV utilizes the receptor determinant  
76 9-*O*-acetyl-*N*-acetylneuraminic acid for cell entry, which is similar to that of the closely related human  
77 Influenza C virus (ICV) (15, 16). The fusion of the IDV HEF glycoprotein with the host cell membrane  
78 is efficient at both 33°C and 37°C, which is in contrast to the HEF glycoprotein of ICV that is restricted  
79 to 33°C (10, 17). This discrepancy between both viruses is mediated by the open receptor-binding  
80 cavity in the HEF of IDV (15). Consequently, due to this temperature insensitivity, IDV can replicate  
81 efficiently at both 33°C and 37°C in various immortalized cell lines, including those derived from  
82 humans (1). Interestingly, like ICV, the HEF glycoprotein of IDV can bind to the luminal surface of  
83 epithelium from the human upper respiratory tract (15). However, this does not necessarily imply that  
84 cells within the human respiratory epithelium can be infected by IDV. Therefore, it remains unclear  
85 whether the ruminant-associated IDV can infect cells within the human respiratory epithelium, and thus  
86 whether it has a zoonotic potential.

87 The respiratory epithelium is the main entry port for respiratory pathogens and is therefore an  
88 important first barrier towards intruding viruses. During the past 15 years, the human airway epithelial  
89 cell (hAECs) culture model has been applied as an *in vitro* surrogate model of the *in vivo* respiratory  
90 epithelium to study a wide range of respiratory viruses (18–26). Including the assessment of the  
91 zoonotic potential of Middle East Respiratory Syndrome coronavirus (MERS-CoV) and a novel  
92 dromedary camel virus related to the common cold virus human coronavirus 229E (HCoV-229E) (27,  
93 28). Although the novel dromedary camel virus replicates in an immortalized human cell line, it failed  
94 to efficiently replicate in the hAEC culture model (28). Indicating that immortalized cell lines do not  
95 always reflect the *in vivo* situation and therefore such results are to be interpreted carefully.

96 As a first step towards identifying the zoonotic potential of IDV we determined the replication  
97 kinetics, cell tropism, and host response at the primary site of replication using the hAEC culture  
98 model. We first inoculated the prototypic D/Bovine/Oklahoma/660/2013 strain on hAEC cultures  
99 established from different donors to monitor virus replication kinetics. This revealed efficient replication  
100 of IDV in hAEC cultures at different body temperatures. To this end we compared the replication  
101 kinetics, cell tropism, and host response of ruminant-associated IDV with that of the human-associated  
102 ICV. Demonstrating that the replication characteristics of IDV has many similarities to the human-  
103 associated ICV, including the cell tropism. To address whether IDV progeny is replication competent,  
104 we performed sequential passaging of IDV upon hAEC cultures from different donors. These results  
105 emphasize, that there is no fundamental restriction of IDV replication within the human respiratory  
106 epithelium. However, our cross-sectional survey, with pooled serum of over a thousand healthy  
107 donors, revealed that there is no evidence that IDV is circulating among the general population.

108

## 109 **Results**

### 110 **Efficient replication of Influenza D virus in hAEC cultures**

111 There are several factors indicating that IDV has zoonotic potential. This includes the broad *in vivo*  
112 and *in vitro* host tropism, utilization of the same receptor determinant as human ICV, and binding of  
113 the HEF glycoprotein to the luminal surface of human respiratory epithelium (1, 15, 16). Although, this  
114 does not necessarily imply that cells within the human respiratory epithelium can be infected by IDV.  
115 Therefore, it remains unclear whether the ruminant-associated IDV indeed can infect cells within the  
116 human respiratory tract and thus whether it has a zoonotic potential. However, the detection of IDV  
117 specific antibodies in individuals whom have occupationally exposure to livestock suggest that there is  
118 spillover from livestock to humans.

119 Therefore we first addressed the question whether IDV can infect cells within the human  
120 respiratory tract. For this we inoculated hAEC cultures from three different donors with the prototypic  
121 D/Bovine/Oklahoma/660/2013 strain. Because the IDV HEF glycoprotein previously showed binding to  
122 the luminal surface of human respiratory epithelium we inoculated our hAEC cultures accordingly. We  
123 monitored viral progeny release for a duration of 72 hours by collecting washes with 24 hour intervals.  
124 This was done at both 33°C and 37°C, as IDV has shown to replicate at these ambient temperatures  
125 that correspond with those of the human upper and lower respiratory tract, respectively. This would  
126 reveal whether there is any temperature restriction for IDV in an *in vitro* surrogate model of the human

127 respiratory epithelium. The release of viral progeny from the apical washes was analyzed by qRT-PCR  
128 for viral transcripts and virus titration for infectious virus. Here we observed that the first viral  
129 transcripts could be detected at 24 hours post-infection (hpi) among all donors, independently of the  
130 incubation temperature (**Figure 1A and B**). However, some temperature dependent differences were  
131 observed when we analyzed the apical washes for infectious virus. For the hAEC cultures incubated at  
132 33°C, viral titers were detected for every donor at 48 and 72 hpi, but only for one donor we could  
133 detect viral titers at 24 hpi (**Figure 1C**). In contrast, for the IDV infection at 37°C we observed viral  
134 titers as early as 24 hpi for every donor that increased over time (**Figure 1D**). These results indicate  
135 that IDV kinetics seems to be more efficient at ambient temperatures corresponding to the human  
136 lower respiratory tract. This, most likely, reflect the necessity for IDV to replicate at the body  
137 temperature of cattle, which is between 37 - 39°C.

138         After having demonstrated that IDV is able to replicate in hAEC cultures from different donors  
139 at both 33°C and 37°C, we wanted to confirm these results through visualization of IDV-infected cells  
140 via immunofluorescence analysis. However, because commercial antibodies against IDV are currently  
141 unavailable, we ordered a custom generated antibody directed against the nucleoprotein (NP) of the  
142 prototypic D/Bovine/Oklahoma/660/2013 strain. With this antibody, we performed microscopic analysis  
143 of IDV-infected hAEC cultures from three different donors 72 hpi. This revealed clusters of NP-positive  
144 cells in IDV-infected hAEC cultures incubated at both 33°C and 37°C, whereas no fluorescence signal  
145 could be observed in the respective control hAEC cultures (**Figure 1E-H**). The majority of fluorescence  
146 signal from the NP-positive cells has a cytoplasmic distribution pattern, however some of those also  
147 appeared to have a nuclear staining pattern. Suggesting that, like other orthomyxoviruses, the NP of  
148 IDV is actively translocated to the nucleus during viral replication (29, 30).

149         These results combined demonstrate that IDV is able to efficiently replicate in hAEC cultures  
150 from different donors at temperatures corresponding to both the upper and lower respiratory tract of  
151 humans.

152

### 153 **Comparison of Influenza C and Influenza D virus infection**

154 Influenza C virus (ICV) is a well-known common cold virus that is able to cause mild upper respiratory  
155 tract infections in humans (31). Because of the structural similarity of the HEF of IDV and ICV, and the  
156 fact that we showed that IDV is able to replicate in hAECs, we wondered how this relates to replication  
157 efficiency in our hAEC cultures. To address this question, we inoculated hAECs with equal amounts of

158 hemagglutination units for ICV (C/Johannesburg/1/66) and IDV and incubated the cultures at 33°C.  
159 This due to the previous reported temperature restriction of the ICV HEF glycoprotein fusion efficiency.  
160 The replication kinetics were monitored as before, by collecting apical washes every 24 hours for a  
161 duration of 72 hours. Here, we observed similar replication kinetics for both viruses, although the viral  
162 RNA yield for ICV was higher compared to IDV (**Figure 2A and B**). However, the replication kinetics of  
163 the IDV-infected hAEC cultures were similar compared to the previous experiment at 33°C (**Figure**  
164 **1A**). Revealing that the replication kinetics for IDV in hAEC cultures is robust and independent from  
165 the donor that is used. More importantly, we show that the replication kinetics of IDV are almost  
166 identical to that of well-known common cold ICV.

167 In addition to the replication kinetics analysis for ICV and IDV in hAEC cultures, we wanted to  
168 determine their respective cell tropism as both viruses utilize the 9-*O*-acetyl-*N*-acetylneuraminic acids  
169 as receptor determinant. For this we formalin-fixed the previous infected hAEC cultures to analyze the  
170 cell tropism for both viruses via immunostaining. To discriminate between the ciliated and non-ciliated  
171 cell types we stained the cultures with well-defined antibodies to visualize the cilia ( $\beta$ -tubulin IV) and  
172 tight junction borders (ZO-1) at the apical surface between the different cells, while the nucleus was  
173 visualized using DAPI. For detection of IDV infected cells we used our previous generated NP-  
174 antibody, whereas for ICV there are unfortunately no commercial antibodies available. Therefore, we  
175 used intravenous immunoglobulins (IVIg) that contains polyclonal immunoglobulin G from over a  
176 thousand of healthy donors, as most people encounter one or multiple ICV infections during their life  
177 and generate antibodies directed against ICV (31, 32). By overlaying the different cellular marker  
178 stains with that of the virus antigen we observed that for both ICV and IDV the virus-positive signal  
179 overlaps with that of the ciliated cell marker (**Figure 2C and 2D**).

180 To accurately define the cell tropism, we counted all cell types among ten random fields per  
181 donor, with the criteria of at least having one virus-positive cell. For the IDV-infected hAEC cultures we  
182 counted a total of 2273 cells of which 94 were NP-positive, while for ICV a total of 2526 cells were  
183 counted with a total of 84 ICV antigen-positive cells. The majority of antigen-positive cells for both IDV  
184 and ICV overlapped with the ciliated cell marker and corresponds with an overall percentage of 97.3  
185 and 95.5, respectively (**Figure 2E**). This is in line with our initial observation, and shows that IDV and  
186 ICV both have a predominant preference for ciliated cells. This is most likely due to the usage of the  
187 same 9-*O*-acetyl-*N*-acetylneuraminic acids as receptor determinant to enter the host cell. In addition to  
188 the cellular tropism, we also calculated the overall infection rate for IDV and ICV, which is 4.1 and 3.3

189 percent, respectively (**Supplementary table 1**). Showing that the overall infection rate of IDV and ICV  
190 are almost identical, which is in accordance with the previous observed replication kinetics.

191 These results establish that the ruminant-associated IDV has almost identical replication  
192 kinetics and overall infection rate characteristics in hAEC cultures to that of the human-associated  
193 ICV. Furthermore, both viruses show to exhibit a predominant preference for ciliated cells, which is  
194 most likely due to the usage of the same receptor determinant for cell entry.

195

### 196 **Host innate immune response**

197 The previous results revealed that the ruminant-associated IDV and the human-associated ICV exhibit  
198 similar infection characteristics in hAEC cultures. Though, whether they share similar characteristics in  
199 terms of host response is unclear. Within the respiratory epithelium, the host innate immune system  
200 plays a pivotal role in the disease outcome during viral infection. Upon the recognition of a viral  
201 pathogen, sensing Pattern Recognition Receptors (PRRs) will bind to their respective signalling  
202 proteins that stimulate the expression of pro-inflammatory cytokines as well as Type I and III  
203 interferons (IFNs), followed by induction of several hundred IFN-Stimulated Genes (ISGs) (33–36).  
204 These ISGs (i) protect the epithelial barrier by altering the intra- and extra-cellular environment, (ii)  
205 impair virus propagation, spread and transmission, and finally (iii) shape the host's adaptive immune  
206 response and thereby impact respiratory disease outcome (33–36).

207 To address whether IDV provokes a similar host response as ICV we inoculated hAEC  
208 cultures of different donors as described previous. However, for the analysis of the host response we  
209 lysed the hAEC cultures at 18, 36, 48 and 72 hpi for relative quantification of interferon (IFN)- $\beta$ , IFN- $\lambda$ 1  
210 and IFN- $\lambda$ 2/3 mRNA-transcripts. Interestingly, for both IDV and ICV there was no upregulation of IFN-  
211  $\beta$  detected. This is in contrast to the IFN- $\lambda$ 1 and IFN- $\lambda$ 2/3 transcripts that all increase overtime (**Figure**  
212 **3A and 3B**). The observed increase was most pronounced for the IDV-infected hAEC cultures, as for  
213 ICV the amplitude in IFN- $\lambda$ 1 and IFN- $\lambda$ 2/3 transcripts increase was approximately 10-fold lower  
214 (**Figure 3A and 3B**). This seemed to correlate with the difference in the amount of cellular associated  
215 viral transcripts for both viruses (data not shown). Because we observed an upregulation in the type III  
216 IFNs mRNA transcripts we wondered whether an induction of downstream ISGs transcripts could be  
217 detected. To this end we also monitored the expression levels for several well-known ISGs, namely  
218 MxA, 2'-5' OAS and IFIT1. Interestingly, for both viruses we observed only a minor upregulation of 2'-  
219 5' OAS and IFIT1 transcripts beyond 48 hpi, while for MxA the transcriptional levels remained constant



220 **(Figure 3C and 3D)**. The minor upregulation of 2'-5' OAS and IFIT1 at 48 hpi seems to correlate with  
221 the observed increase level of Type III IFN transcripts. However, in which extend this would impair  
222 virus propagation and spread remains to be elucidated.

223 Nonetheless, these results reveal that both the human-associated ICV and ruminant-  
224 associated IDV provoke a similar type of host response during infection, which is characterized by an  
225 induction of only type III IFNs.

226

### 227 **Sequential propagation and seroprevalence of IDV**

228 A requisite for the successfully establish of a zoonotic virus among the human population is the  
229 availability of a cellular entry receptor. Followed by, cell entry and efficient replication within the new  
230 host that usually coincides with efficient suppression of the host's innate immune response to prevent  
231 impairment of virus propagation, spread and subsequent transmission. We are aware that not all of  
232 these zoonotic prerequisites can be addressed with the hAEC cultures. Though, thus far, we  
233 demonstrated that IDV is able to replicate efficiently in an *in vitro* surrogate model of the human  
234 respiratory epithelium and that during this process an innate immune response is induced. Still,  
235 whether this host response would impair subsequent virus propagation and spread could potentially  
236 be addressed through sub-passaging IDV obtained from one donor onto hAEC cultures from different  
237 donors.

238 We therefore decided to use the individual apical washes from the three donors from our cell  
239 tropism experiment to inoculate hAEC cultures of a different donor (P2), of which the 48 hpi apical  
240 wash is diluted and used for further sub-passaging upon hAEC cultures of the same donor (P3; **Figure**  
241 **4A**). To investigate a role of temperature on subsequent virus propagation and spread we performed  
242 this experiment at both 33°C and 37°C. During which we monitored the release of viral progeny from  
243 the apical washes at 48 and 96 hpi for each sub-passaging experiment. In the first passaging  
244 experiment we observed a viral RNA yield at 48 hpi that increased with one order of magnitude at 96  
245 hpi (**Figure 4B**). However, we observed that the viral yield at 37°C was approximately one order lower  
246 in the first round compared to the viral yield at 33°C, however at 96 hpi this difference was slightly  
247 reduced. Interestingly, in the second passaging experiment we did not observe any difference  
248 between the different incubation temperatures (**Figure 4B**). In addition, we observed no pronounced  
249 differences in the viral titers between the different temperatures or passage numbers at 96 hpi (**Figure**  
250 **4C**). However, at 48 hpi we could only detect infectious virus in the apical wash from the last

251     passaging experiment that was performed at 37°C (P3; **Figure 4C**). These results show that the viral  
252     progeny from the initial experiments on hAEC cultures is replication competent and that IDV can be  
253     sub-passaged on hAEC cultures from different donors at both 33°C and 37°C.

254             This observation raises the question if IDV is potentially circulating among the general  
255     population. To address this question, we performed a cross-sectional serological survey using IVIg in  
256     a hemagglutination inhibition (HI) assay to determine whether IDV-directed antibodies can be detected  
257     among pooled immunoglobulin G from thousands of healthy donors. For the HI assay we used ICV as  
258     a positive control, as the majority of adults have antibodies towards this virus and we could previously  
259     detect ICV-positive cells by immunofluorescence. Here we could readily observe that IVIg inhibited red  
260     blood cell hemagglutination by ICV, however for IDV no inhibition was observed (**Figure 4D and 4E**).  
261     Indicating that, unlike ICV, no IDV-directed antibodies can be detected among the general population  
262     and that pre-existing antibodies against ICV are not cross-reactive against IDV.

263             Combined these results highlight that there is no intrinsic barrier for IDV to replicated within  
264     the human respiratory epithelium. However, thus far, there is no evidence that IDV is circulating  
265     among the general population.

266

267

## 268 Discussion

269 In this study, we demonstrate that IDV replicates efficiently in an *in vitro* surrogate model of  
270 the *in vivo* respiratory epithelium at different ambient temperatures corresponding to the human upper  
271 and lower respiratory tract. Intriguingly, the replication characteristics of the ruminant-associated IDV  
272 revealed many similarities to the human-associated ICV, including the tropism for ciliated cells.  
273 Moreover, analysis of the host response during IDV infection revealed only a pronounced upregulation  
274 of Type III IFN transcripts. Nonetheless, viral progeny virus showed to be replication competent as it  
275 could be efficiently propagated onto hAEC cultures from different donors at both 33°C and 37°C.  
276 Emphasizing that there is no intrinsic impairment of IDV propagation within the human respiratory  
277 epithelium.

278 For inter-species transmission a virus needs to overcome several barriers before it can  
279 efficiently replicate in the new host species (37). These barriers can be classified into three major  
280 groups; (i) viral entry through availability of the cellular receptor and proteases, (ii) viral replication and  
281 subversion of the host innate immune system followed by (iii) viral egress and release of infectious  
282 progeny virus. Our results clearly demonstrates that IDV fulfils most of these criteria, as there is no  
283 fundamental restriction for viral replication and sequential propagation of IDV within hAEC cultures  
284 from different donors. Altogether, this might explain why IDV-directed antibodies are detected among  
285 individuals whom have occupationally exposure to livestock (14). However, we cannot assess whether  
286 IDV can be transmitted among humans with our model. Nonetheless, it is interesting to note that, IDV  
287 can be transmitted among infected and naïve ferrets, an animal model often used as surrogate model  
288 to assess transmission potential of influenza A viruses among humans (1, 38, 39). However, besides  
289 individuals whom have occupationally exposure to livestock there is currently no epidemiological  
290 evidence that IDV is circulating among the general population. Suggesting that beyond the spillover  
291 from livestock to humans virus transmission might be restricted due to unknown host factors.

292 Within the respiratory epithelium, the host innate immune system plays a pivotal role in the  
293 disease outcome during viral infection. Interestingly, in our study we observed a pronounced  
294 upregulation for Type III IFNs, but not for Type I IFN. This data suggest that Type III IFNs play a more  
295 pronounced role in comparison to Type I IFNs in the context of IDV infection in the human respiratory  
296 epithelium. In contrast to the IFN expression, we only detected a mild upregulation for some ISGs  
297 transcripts during IDV infection. This suggests that certain proteins of IDV, such as the non-structural  
298 protein 1 (NS1), might efficiently antagonize the induction of ISGs in the human airway epithelium.

299 Something we have observed previously for another respiratory virus with zoonotic potential (27).  
300 Conversely, thus far, we only determined the host response up to 72 hpi and therefore it might be that  
301 a more pronounced ISGs induction can be observed during later time points. Therefore expanding our  
302 knowledge on the dynamics of the innate immune response at multiple stages during IDV infection and  
303 the role of host and viral proteins herein remains warranted.

304 During our study we used the prototypic D/Bovine/Oklahoma/660/2013 strain representing one  
305 of the two distinct cocirculating lineages of IDV (10). The prototypic D/Swine/Oklahoma/1334/2011 is  
306 the representative strain of the other lineage (10). Both lineages have greater than 96% identity from  
307 which the HEF glycoprotein (96.7 to 99.0% identity) is the most divergent of all 7 segments (2).  
308 However, due to the high similarity it is likely that the replication characteristics observations from our  
309 experiments are similar between both lineages. Especially, as the previous described IDV replication  
310 in human cell lines and the binding of the HEF glycoprotein to the human respiratory epithelium have  
311 all been performed in the context of the prototypic D/Swine/Oklahoma/1334/2011 strain (1, 15).  
312 Nonetheless, whether both cocirculating lineages of IDV indeed exhibit similar characteristics in  
313 human respiratory epithelium remains formally to be elucidated.

314 Both IDV and ICV utilize the 9-*O*-acetyl-*N*-acetylneuraminic acid as their receptor determinant  
315 for host cell entry (15, 16). We have shown that both viruses have a predominant affinity towards  
316 ciliated cells, suggesting that the distribution of this type of sialic acid is limited to ciliated cells within  
317 our *in vitro* model of the human airway epithelium. This tropism is similar to what we previously  
318 observed for the human coronavirus OC43, from which it has been reported to also utilize the 9-*O*-  
319 acetyl-*N*-acetylneuraminic acid as receptor determinant (22, 40). Nonetheless, whether this cell  
320 tropism for both IDV and ICV corresponds to that of *in vivo* airway epithelium remains to be  
321 determined. Although, previous studies have shown that the hAEC cultures recapitulates many  
322 characteristics of the *in vivo* airway epithelium, including receptor distribution (18, 22).

323 In summary, we demonstrate that IDV replicates efficiently in an *in vitro* surrogate model of the  
324 *in vivo* respiratory epithelium. Highlighting, that there is no intrinsic impairment of IDV propagation  
325 within the human respiratory epithelium. These results might explain why IDV-directed antibodies are  
326 detected among individuals whom have occupationally exposure to livestock.

327

328

329

## 330 **Material and methods**

### 331 **Cell culture**

332 The Madin-Darby Bovine Kidney (MDBK) cells were maintained in Eagle's Minimum Essential Medium  
333 (EMEM; (Seroglob) supplemented with 7% heat-inactivated fetal bovine serum (FBS, Seraglob), 2mM  
334 Glutamax (Gibco), 100 µg/ml Streptomycin and 100 IU/ml Penicillin (Gibco). Whereas the Madin-  
335 Darby Canine Kidney (MDCK) cells were maintained in EMEM, supplemented with 5% heat-  
336 inactivated FBS, 100 µg/ml Streptomycin and 100 IU/ml Penicillin (Gibco). Both cell lines were  
337 propagated at 37°C in a humidified incubator with 5% CO<sub>2</sub>.

338

### 339 **Viruses**

340 The Influenza D virus (D/Bovine/Oklahoma/660/2013) was kindly provided by Dr. Feng Li, University of  
341 South Dakota, USA, and was inoculated on MDBK cells and propagated in infection medium (EMEM,  
342 supplemented with 0.5% Bovine Serum Albumin (Sigma-Aldrich), 15 mM of 4-(2-hydroxyethyl)-1-  
343 piperazineethanesulfonic acid (HEPES, Gibco), 100 µg/ml Streptomycin and 100 IU/ml Penicillin  
344 (Gibco), and 1 µg/mL Bovine pancreas-isolated acetylated trypsin (Sigma-Aldrich)). Infected MDBK  
345 cultures were maintained for 96 hours at 37°C. The influenza C virus strain C/Johannesburg/1/66 was  
346 inoculated on MDCK cells and propagated in infection medium and maintained for 96 hours at 33°C.  
347 Virus containing supernatant was cleared from cell debris through centrifugation for 5 minutes at 500x  
348 *rcf* before aliquoting and storage at -80°C.

349

### 350 **Human airway epithelial cell culture**

351 Primary human bronchial cells were isolated from patients (>18 years old) undergoing bronchoscopy  
352 or pulmonary resection at the Cantonal Hospital in St. Gallen, Switzerland, in accordance with our  
353 ethical approval (EKSG 11/044, EKSG 11/103 and KEK-BE 302/2015). Isolation and culturing of  
354 primary human bronchial epithelial cells was performed as previously described (41), with the minor  
355 modification of supplementing the BEGM with 10µM Rho associated protein kinase inhibitor (Y-  
356 27632, Abcam).

357

### 358 **Viral replication in hAEC cultures**

359 The hAEC cultures were inoculated with 10000 TCID<sub>50</sub>, or 32 hemagglutination units, of either Influenza  
360 D virus or Influenza C virus and incubated for 1.5 hours at temperatures indicated elsewhere in a

361 humidified incubator with 5% CO<sub>2</sub>. Afterwards inoculum was removed and the apical surface was  
362 washed three times with HBSS, after which the cells were incubated at indicated temperatures in a  
363 humidified incubator with 5% CO<sub>2</sub>. The infection was monitored as indicated, during which progeny  
364 virus was collected by incubating the apical surface with 100µL of HBSS for 10 minutes prior to the  
365 time point. Collected apical washes were stored 1:1 in virus transport medium (VTM) for later  
366 quantification (41).

#### 367 **Virus titration**

368 MDBK cells were seeded at a concentration of 40.000 cells per well in a 96-cluster well plates. The  
369 following day medium was removed and cells were washed once with PBS and replaced with 50 µl of  
370 infection medium. Virus containing samples were ten-fold serial diluted in infection medium, from  
371 which 50 µl was added to the MDBK cells in six technical replicates per sample. The inoculated cells  
372 were incubated for 72 hours at 37°C in a humidified incubator with 5% CO<sub>2</sub>, after they were fixed by  
373 crystal violet to determine the titer according to the protocol of Spearman-Kärber (42).

374

#### 375 **Hemagglutination assay**

376 Chicken blood for the hemagglutination agglutination (HA) and hemagglutination inhibition (HI) assays  
377 was obtained from SPF-bred white Leghorn chickens in compliance with the Animal Welfare Act  
378 (TSchG SR 455), the Animal Welfare Ordinance (TSchV SR 455.1), and the Animal Experimentation  
379 Ordinance (TVV SR 455.163) of Switzerland. That was reviewed by the ethical committee for animal  
380 experiments of the canton of Bern and approved by the cantonal veterinary authorities (Amt für  
381 Landwirtschaft und Natur LANAT, Veterinärdienst VeD, Bern, Switzerland) with the agreement  
382 BE78/17. The hemagglutination agglutination and hemagglutination inhibition assays were performed  
383 using 1% chicken red blood cells diluted in ice-cold PBS as described previous (43). For the HI assay  
384 Intravenous Immunoglobulins (IVIg; Sanquin, the Netherlands) was pretreated with receptor-  
385 destroying enzyme (Denka Seiken) for 18 hours at 37°C, followed by an inactivation for 30 minutes at  
386 56 °C. The HA- or HI-titer was determined after 30 minutes incubation at room temperature by  
387 recording the highest serial dilution that still displayed tear-formation after the plate was tilted 45° for  
388 30 seconds.

389

390

#### 391 **Quantitative Real-time PCR (qRT-PCR)**

392 Total cellular RNA from infected hAECs was extracted using the NucleoMag RNA (Macherey-Nagel)  
393 according to manufacturer guidelines on a Kingfisher Flex Purification system (Thermofisher). Reverse  
394 transcription was performed with GoScript™ reverse transcriptase mix random hexamers according to  
395 the manufacturer's protocol (A2800; Promega) using 200 ng of total RNA. Two microliters of tenfold  
396 diluted cDNA was amplified using Fast SYBR™ Green Master Mix (Thermofisher) according to the  
397 manufacturer's protocol using primers targeting 18S and MxA, 2'-5'-OAS, IFIT1 as described  
398 previously (27). Measurements and analysis were performed using an ABI7500 instrument and  
399 software package (ABI). Relative gene expression was calculated using the 2- $\Delta\Delta$ Ct method and is  
400 shown as fold induction of compared to that of non-infected controls (44).

401 For quantification of the viral kinetics of IDV and ICV, a total of 50  $\mu$ L of apical wash was used to  
402 extract viral RNA using the NucleoMag VET (Macherey-Nagel) according to manufacturer guidelines  
403 on a Kingfisher Flex Purification system (Thermofisher). Two microliters of extracted RNA was  
404 amplified using TaqMan™ Fast Virus 1-Step Master Mix (Thermofisher) according to the  
405 manufacturer's protocol using the forward primer 5'-AACCTGCTTCTGCTTGCAATCT-3', reverse 5'-  
406 AACAAATGAACAGTTACCGCATCA-3' and probe 5'-FAM-AGACCTGTCTAAAACCTATTT-BHQ1-3'  
407 targeting the P42/M-segment of ICV (AM410042.1). Whereas for the P42/M-segment of IDV  
408 (KF425664.1) the forward 5'-ATGCTGAAACTGTGGAAGAATTTTG-3', reverse 5'-  
409 GGTCTTCCATTTATGATTGTCAACAA-3' and probe 5'-FAM-AAGGTTTATGTCCATTGTTTCA-  
410 BHQ1-3' were used. A standard curve of the P42/M-segment of Influenza C or D virus, cloned in  
411 pHW2000 plasmid, was included to interpolate the amount of genomic equivalents (45).  
412 Measurements and analysis were performed using an ABI7500 instrument and software package  
413 (ABI).

414

#### 415 **Immunofluorescence of hAEC cultures**

416 The hAEC cultures were formalin-fixed and stained for immunofluorescence as previously described  
417 (41). For the detection of IDV-positive cells, hAEC cultures were stained with a custom generated  
418 rabbit polyclonal antibody directed against the nucleoprotein (NP) of the prototypic  
419 D/Bovine/Oklahoma/660/2013 strain (Genscript). Alexa Fluor® 647-labeled donkey anti-Rabbit IgG  
420 (H+L) (Jackson Immunoresearch) was applied as secondary antibody. For the characterization and  
421 quantification of IDV cell tropism hAEC cultures were stained with the previous custom generated  
422 polyclonal rabbit anti-NP (Genscript), mouse Anti- $\beta$ -tubulin IV (AB11315, Abcam), goat anti-ZO1

423 (AB99642, Abcam). Alexa Fluor® 488-labeled donkey anti-mouse IgG (H+L), Cy3-labeled donkey anti-  
424 goat IgG (H+L) and Alexa Fluor® 647-labeled donkey anti-Rabbit IgG (H+L) (Jackson  
425 Immunoresearch). In the case of ICV, hAEC cultures were stained with human IVIg (Sanquin, the  
426 Netherlands), mouse Anti- $\beta$ -tubulin IV (AB11315, Abcam), rabbit anti-ZO1 (617300, Thermofisher).  
427 Using Alexa Fluor® 488-labeled donkey anti-mouse IgG (H+L), Alexa Fluor® 594-labeled donkey anti-  
428 human IgG (H+L) and Alexa Fluor® 647-labeled donkey anti-Rabbit IgG (H+L) (Jackson  
429 Immunoresearch) as secondary antibodies. All samples were counterstained using 4',6-  
430 diamidino-2-phenylindole (DAPI, Thermofischer) to visualize the nuclei. The immunostained inserts  
431 were mounted on Colorforst Plus microscopy slides (Thermofischer) in Prolong diamond antifade  
432 mountant (Thermo Fischer) and overlaid with 0.17 mm high precision coverslips (Marienfeld). The Z-  
433 stack images were acquired on a DeltaVision Elite High-Resolution imaging system (GE Healthcare  
434 Life Sciences) using a step size of 0.2  $\mu$ m with a 60x/1.42 oil objective. Images were deconvolved and  
435 cropped using the integrated softWoRx software package and processed using Fiji (ImageJ) and  
436 Imaris version 9.1.3 (Bitplane AG, Zurich, Switzerland) software packages.

437

#### 438 **Data presentation**

439 Data was plotted using GraphPad Prism 7 and figures were assembled in Adobe InDesign CS6.

440

#### 441 **Acknowledgements**

442 We like to thank Prof. Dr. Feng Li from the South Dakota University, United States, for providing the  
443 influenza D virus (D/Bovine/Oklahoma/660/2013) and Prof. Dr. Georg Herrler, University of Veterinary  
444 Medicine Hannover, Germany for providing the Influenza C virus (C/Johannesburg/1/66). Moreover,  
445 we would like to thank Nicolas Ruggli and the team of animal caretakers for technical assistance. This  
446 study was supported by the Swiss National Science Foundation (project 310030\_179260).

447

448



## 449 References

450

- 451 1. Hause BM, Ducatez M, Collin EA, Ran Z, Liu R, Sheng Z, Armien A, Kaplan B, Chakravarty S,  
452 Hoppe AD, Webby RJ, Simonson RR, Li F. 2013. Isolation of a Novel Swine Influenza Virus  
453 from Oklahoma in 2011 Which Is Distantly Related to Human Influenza C Viruses. *PLoS*  
454 *Pathog* 9.
- 455 2. Hause B, Collin E, Liu R, Huang B, Sheng Z, Lu W. 2014. Characterization of a novel influenza  
456 virus strain in cattle and swine: proposal for a new genus in the Orthomyxoviridae family. *MBio*  
457 5:1–10.
- 458 3. Foni E, Chiapponi C, Baioni L, Zanni I, Merenda M, Rosignoli C, Kyriakis CS, Luini MV,  
459 Mandola ML, Nigrelli AD, Faccini S. 2017. Influenza D in Italy: towards a better understanding  
460 of an emerging viral infection in swine. *Sci Rep* 1–7.
- 461 4. Zhai S, Zhang H, Chen S, Zhou X, Lin T, Liu R, Lv D, Wen X, Wei W, Wang D, Li F. 2017.  
462 Influenza D Virus in Animal Species in Guangdong province, Southern China 23.
- 463 5. Horimoto T, Hiono T, Mekata H, Odagiri T, Lei Z, Kobayashi T, Norimine J, Inoshima Y, Hikono  
464 H, Murakami K, Sato R, Murakami H, Sakaguchi M, Ishii K, Ando T, Otomaru K, Ozawa M,  
465 Sakoda Y, Murakami S. 2016. Nationwide distribution of bovine influenza D virus infection in  
466 Japan. *PLoS One* 11:1–7.
- 467 6. Luo J, Ferguson L, Smith DR, Woolums AR, Epperson WB, Wan XF. 2017. Serological  
468 evidence for high prevalence of Influenza D Viruses in Cattle, Nebraska, United States, 2003–  
469 2004. *Virology* 501:88–91.
- 470 7. Ducatez MF, Pelletier C, Meyer G. 2015. Influenza d virus in cattle, France, 2011–2014. *Emerg*  
471 *Infect Dis* 21:368–371.
- 472 8. Flynn O, Gallagher C, Mooney J, Irvine C, Ducatez M, Hause B, Mcgrath G, Ryan E. 2018.  
473 Influenza D Virus in Cattle, Ireland. *Emerg Infect Dis* 24:2016–2018.
- 474 9. Salem E, Cook EAJ, Lbacha HA, Oliva J, Awoume F, Aplogan GL, Hymann EC, Muloi D,  
475 Deem SL, Alali S, Zouagui Z, Fèvre EM, Meyer G, Ducatez MF. 2017. Serologic Evidence for  
476 Influenza C and D Virus among Ruminants and Camelids, Africa, 1991-2015. *Emerg Infect Dis*  
477 23:2015–2018.
- 478 10. Collin EA, Sheng Z, Lang Y, Ma W, Hause BM, Li F. 2015. Cocirculation of Two Distinct  
479 Genetic and Antigenic Lineages of Proposed Influenza D Virus in Cattle. *J Virol* 89:1036–1042.
- 480 11. Ferguson L, Olivier AK, Genova S, Epperson WB, Smith DR, Schneider L, Barton K, McCuan  
481 K, Webby RJ, Wan X-F. 2016. Pathogenesis of Influenza D virus in Cattle. *J Virol*  
482 90:JVI.03122-15.
- 483 12. Ferguson L, Luo K, Olivier AK, Cunningham FL, Blackmon S, Hanson-dorr K, Sun H, Baroch J,  
484 Lutman MW, Quade B, Epperson W, Webby R, Deliberto TJ, Wan X. 2018. Influenza D Virus  
485 Infection in Feral Swine Populations , United States. *Emerg Infect Dis* 24.
- 486 13. Nedland H, Wollman J, Sreenivasan C, Quast M, Singrey A, Fawcett L, Christopher-Hennings  
487 J, Nelson E, Kaushik RS, Wang D, Li F. 2017. Serological evidence for the co-circulation of two  
488 lineages of influenza D viruses in equine populations of the Midwest United States. *Zoonoses*  
489 *Public Health* 1–7.
- 490 14. White SK, Ma W, McDaniel CJ, Gray GC, Lednicky JA. 2016. Serologic evidence of exposure  
491 to influenza D virus among persons with occupational contact with cattle. *J Clin Virol* 81:31–33.
- 492 15. Song H, Qi J, Khedri Z, Diaz S, Yu H, Chen X, Varki A, Shi Y, Gao GF. 2016. An Open  
493 Receptor-Binding Cavity of Hemagglutinin-Esterase-Fusion Glycoprotein from Newly-Identified  
494 Influenza D Virus: Basis for Its Broad Cell Tropism. *PLoS Pathog* 12.
- 495 16. Rogers GN, Herrler G, Paulson JC, Klenk HD. 1986. Influenza C virus uses 9-O-acetyl-N-  
496 acetylneuraminic acid as a high affinity receptor determinant for attachment to cells. *J Biol*  
497 *Chem* 261:5947–5951.
- 498 17. Takashita E, Muraki Y, Sugawara K, Asao H, Nishimura H, Suzuki K, Tsuji T, Hongo S, Ohara  
499 Y, Kawaoka Y, Ozawa M, Matsuzaki Y. 2012. Intrinsic Temperature Sensitivity of Influenza C  
500 Virus Hemagglutinin-Esterase-Fusion Protein. *J Virol*.
- 501 18. Raj VS, Mou H, Smits SL, Dekkers DHW, Müller M a, Dijkman R, Muth D, Demmers J a a, Zaki  
502 A, Fouchier R a M, Thiel V, Drosten C, Rottier PJM, Osterhaus ADME, Bosch BJ, Haagmans  
503 BL. 2013. Dipeptidyl peptidase 4 is a functional receptor for the emerging human coronavirus-  
504 EMC. *Nature* 495:251–4.
- 505 19. Dijkman R, Koekkoek SM, Molenkamp R, Schildgen O, van der Hoek L. 2009. Human  
506 bocavirus can be cultured in differentiated human airway epithelial cells. *J Virol* 83:7739–7748.
- 507 20. Matrosovich MN, Matrosovich TY, Gray T, Roberts NA, Klenk HD. 2004. Human and avian  
508 influenza viruses target different cell types in cultures of human airway epithelium. *Proc Natl*  
509 *Acad Sci U S A* 101:4620–4624.

- 510 21. Pirc K, Sims AC, Dijkman R, Jebbink M, Long C, Deming D, Donaldson E, Vabret A, Baric R,  
511 van der Hoek L, Pickles R. 2010. Culturing the unculturable: human coronavirus HKU1 infects,  
512 replicates, and produces progeny virions in human ciliated airway epithelial cell cultures. *J Virol*  
513 84:11255–11263.
- 514 22. Dijkman R, Jebbink MF, Koekkoek SM, Deijs M, Jónsdóttir HR, Molenkamp R, Ieven M,  
515 Goossens H, Thiel V, van der Hoek L. 2013. Isolation and characterization of current human  
516 coronavirus strains in primary human epithelial cell cultures reveal differences in target cell  
517 tropism. *J Virol* 87:6081–90.
- 518 23. Sims AC, Baric RS, Yount B, Burkett SE, Collins PL, Pickles RJ. 2005. Severe acute  
519 respiratory syndrome coronavirus infection of human ciliated airway epithelia: role of ciliated  
520 cells in viral spread in the conducting airways of the lungs. *J Virol* 79:15511–15524.
- 521 24. Zhang L, Peeples ME, Boucher RC, Collins PL, Pickles RJ. 2002. Respiratory syncytial virus  
522 infection of human airway epithelial cells is polarized, specific to ciliated cells, and without  
523 obvious cytopathology. *J Virol* 76:5654–5666.
- 524 25. Zhang L, Bukreyev A, Thompson CI, Watson B, Peeples ME, Collins PL, Pickles RJ. 2005.  
525 Infection of Ciliated Cells by Human Parainfluenza Virus Type 3 in an In Vitro Model of Human  
526 Airway Epithelium. *J Virol* 79:1113–1124.
- 527 26. Lopez-Souza N, Favoreto S, Wong H, Ward T, Yagi S, Schnurr D, Finkbeiner WE, Dolganov  
528 GM, Widdicombe JH, Boushey HA, Avila PC. 2009. In vitro susceptibility to rhinovirus infection  
529 is greater for bronchial than for nasal airway epithelial cells in human subjects. *J Allergy Clin*  
530 *Immunol* 123:1384–1390.e2.
- 531 27. Kindler E, Jónsdóttir HR, Muth D, Hamming OJ, Hartmann R, Rodriguez R, Geffers R,  
532 Fouchier RAM, Drosten C, Müller MA, Dijkman R, Thiel V. 2013. Efficient replication of the  
533 novel human betacoronavirus EMC on primary human epithelium highlights its zoonotic  
534 potential. *MBio* 4.
- 535 28. Corman VM, Eckerle I, Memish ZA, Liljander AM, Dijkman R, Jonsdottir H, Juma Ngeiywa KJZ,  
536 Kamau E, Younan M, Al Masri M, Assiri A, Gluecks I, Musa BE, Meyer B, Müller MA, Hilali M,  
537 Bornstein S, Wernery U, Thiel V, Jores J, Drexler JF, Drosten C. 2016. Link of a ubiquitous  
538 human coronavirus to dromedary camels. *Proc Natl Acad Sci*.
- 539 29. Wang P, Palese P, O'Neill RE. 1997. The NPI-1/NPI-3 Nucleoprotein, (karyopherin  $\alpha$ ) binding  
540 site on the influenza A virus NP is a nonconventional nuclear localization signal. *J Virol*  
541 71:1850–1856.
- 542 30. Ozawa M, Fujii K, Muramoto Y, Yamada S, Yamayoshi S, Takada A, Goto H, Horimoto T,  
543 Kawaoka Y. 2007. Contributions of two nuclear localization signals of influenza A virus  
544 nucleoprotein to viral replication. *J Virol*.
- 545 31. Matsuzaki Y, Katsushima N, Nagai Y, Shoji M, Sakamoto M, Kitaoka S, Mizuta K, Nishimura H,  
546 The S, Diseases I, May N, Matsuzaki Y, Katsushima N, Nagai Y, Shoji M, Itagaki T, Sakamoto  
547 M. 2006. Clinical Features of Influenza C Virus Infection in Children. *J Infect Dis* 193:1229–  
548 1235.
- 549 32. Salez N, Mélade J, Pascalis H, Aherfi S, Dellagi K, Charrel RN, Carrat F, de Lamballerie X.  
550 2014. Influenza C virus high seroprevalence rates observed in 3 different population groups. *J*  
551 *Infect* 69:182–189.
- 552 33. de Veer MJ, Holko M, Frevel M, Walker E, Der S, Paranjape JM, Silverman RH, Williams BR.  
553 2001. Functional classification of interferon-stimulated genes identified using microarrays. *J*  
554 *Leukoc Biol*.
- 555 34. Sanders CJ, Doherty PC, Thomas PG. 2011. Respiratory epithelial cells in innate immunity to  
556 influenza virus infection. *Cell Tissue Res*.
- 557 35. Samarajiwa SA, Forster S, Auchetl K, Hertzog PJ. 2009. INTERFEROME: The database of  
558 interferon regulated genes. *Nucleic Acids Res*.
- 559 36. Der SD, Zhou A, Williams BRG, Silverman RH. 1998. Identification of genes differentially  
560 regulated by interferon alpha, beta, or gamma using oligonucleotide arrays. *Proc Natl Acad Sci*.
- 561 37. Kuiken T, Holmes EC, McCauley J, Rimmelzwaan GF, Williams CS, Grenfell BT. 2006. Host  
562 Species Barriers to Influenza Virus Infections. *Science* (80- ) 312:394–397.
- 563 38. Herfst S, Schrauwen EJA, Linster M, Chutinimitkul S, De E, Munster VJ, Sorrell EM,  
564 Bestebroer TM, Burke DF, Derek J, Rimmelzwaan GF, Osterhaus ADME, Fouchier RAM.  
565 2012. Airborne Transmission of Influenza A/H5N1 Virus Between Ferrets. *Science* (80- )  
566 336:1534–1541.
- 567 39. Imai M, Watanabe T, Hatta M, Das SC, Ozawa M, Shinya K, Zhong G, Hanson A, Katsura H,  
568 Watanabe S, Li C, Kawakami E, Yamada S, Kiso M, Suzuki Y, Maher EA, Neumann G,  
569 Kawaoka Y. 2012. Experimental adaptation of an influenza H5 HA confers respiratory droplet  
570 transmission to a reassortant H5 HA/H1N1 virus in ferrets. *Nature* 486:420–428.
- 571 40. Vlasak R, Luytjes W, Spaan W, Palese P. 1988. Human and bovine coronaviruses recognize

- 572 sialic acid-containing receptors similar to those of influenza C viruses. Proc Natl Acad Sci U S  
573 A.
- 574 41. Jonsdottir HR, Dijkman R. 2015. Characterization of Human Coronaviruses on Well-  
575 Differentiated Human Airway Epithelial Cell Cultures, p. 73–87. *In* Maier, HJ, Bickerton, E,  
576 Britton, P (eds.), *Coronaviruses: Methods and Protocols*. Springer New York, New York, NY.
- 577 42. Hierholzer JC, Killington RA. 1996. 2 - Virus isolation and quantitation, p. 25–46. *In* Mahy,  
578 BWJ, Kangro, HO (eds.), *Virology Methods Manual*. Academic Press, London.
- 579 43. WHO Global Influenza Surveillance Network. 2011. Manual for the laboratory diagnosis and  
580 virological surveillance of influenza. WHO press, Geneva, Switzerland.
- 581 44. Livak KJ, Schmittgen TD. 2001. Analysis of relative gene expression data using real-time  
582 quantitative PCR and the  $2^{-\Delta\Delta CT}$  method. *Methods*.
- 583 45. Hoffmann E, Neumann G, Kawaoka Y, Hobom G, Webster RG. 2000. A DNA transfection  
584 system for generation of influenza A virus from eight plasmids. Proc Natl Acad Sci 97:6108–  
585 6113.
- 586
- 587

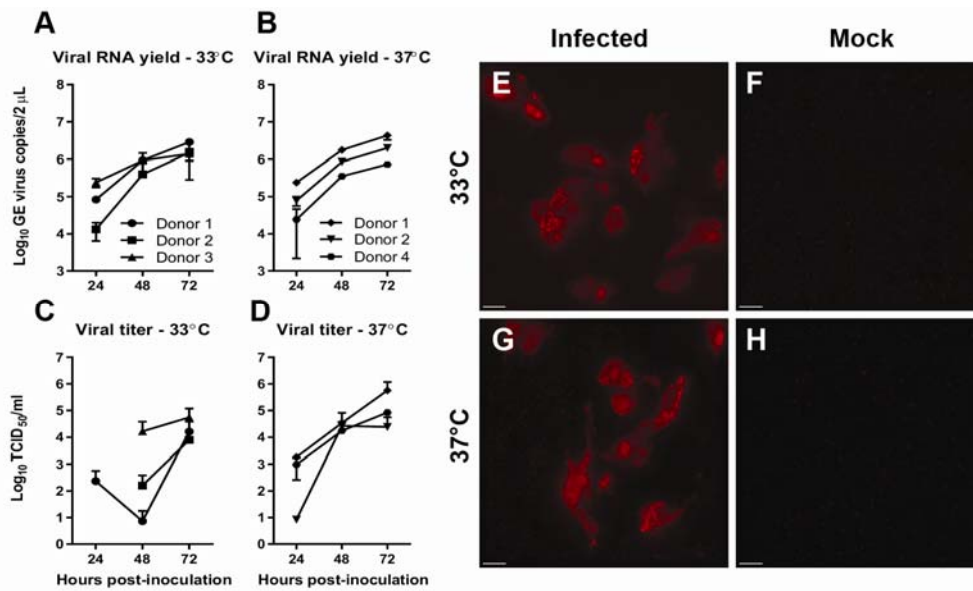

588

589 **Figure 1. Efficient replication of Influenza D virus in hAEC cultures.**

590 Human airway epithelial cell cultures were inoculated with 10000 TCID<sub>50</sub> of IDV and incubated at  
591 either 33°C or 37°C. The monitored viral RNA yield is given as genomic equivalents (GE) per 2 μL of  
592 isolated RNA (y-axis) at indicated hours post-inoculation (x-axis) for 33°C (A) and 37°C (B). Whereas  
593 the viral titer is given as TCID<sub>50</sub>/mL (y-axis) for 33°C (C) and 37°C (D) at indicated hours post-  
594 inoculation (x-axis). These results are displayed as means and SD from duplicates from three  
595 independent donors. Human airway epithelial cell cultures were formalin-fixed and immunostained with  
596 a custom generated antibody against the Nucleoprotein of the Influenza D virus to detect virus infected  
597 cells. A representative image from one of the three independent donors is shown for Influenza D virus  
598 infection at 33°C and 37°C (E&G) as well as their respective controls (F&H). Magnification 60x, the  
599 scale bar represent 10 μM.

600

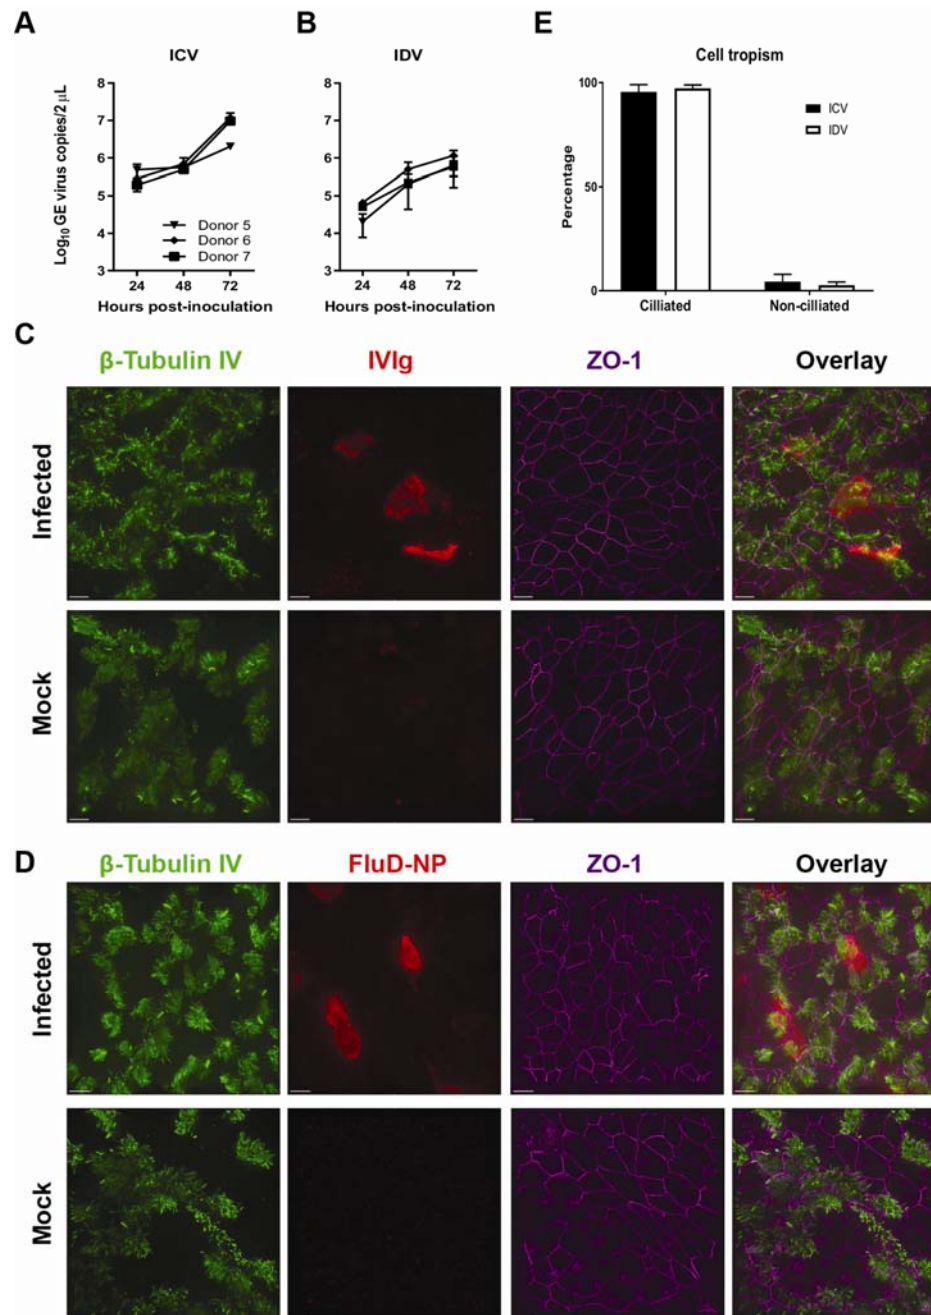

601

602 **Figure 2. Comparison of Influenza C and Influenza D virus infection.**

603 Human airway epithelial cell cultures were inoculated with 32 Hemagglutination assay units of ICV or  
604 IDV and incubated at 33°C. The monitored viral RNA yield is given as genomic equivalents (GE) per 2  
605 µL of isolated RNA (y-axis) at indicated hours post-inoculation (x-axis) for Influenza C virus (**A**) and  
606 Influenza D virus (**B**). The results are displayed as means and SD from duplicates from three  
607 independent donors.

608 Formalin-fixed ICV and IDV infected hAEC cultures and their respective controls were immunostained  
609 with antibodies to visualize the cilia (β-tubulin IV, green), tight junction borders (ZO-1, purple).

610 Whereas virus-infected cells (red) were visualized with either a custom generated IDV NP-antibody or  
611 intravenous immunoglobulins (IVIg) for ICV (**C&D**). Magnification 60x, the scale bar represent 10  $\mu$ M.  
612 The cell tropism of ICV (Black bars) and IDV (white bars) was quantified by calculating the percentage  
613 of viral antigen-positive signal co-localization with either ciliated or non-ciliated cells (**E**). The mean  
614 percentage and SEM from ten random fields from three independent donors are displayed.  
615

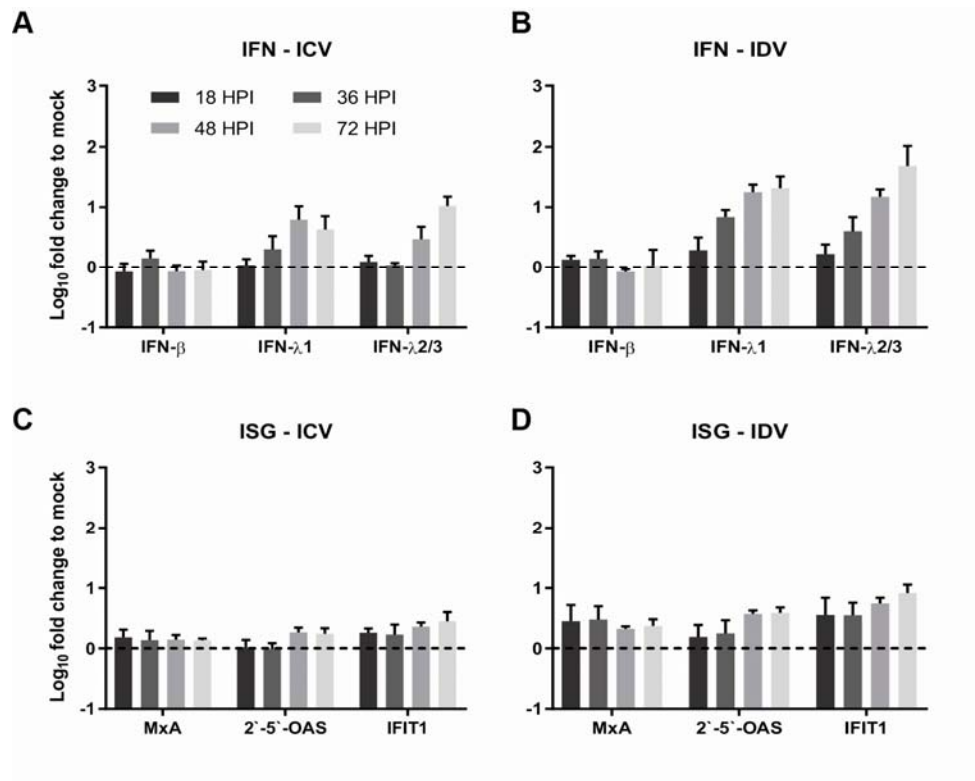

616

617 **Figure 3. Transcriptional host response during ICV and IDV infection in hAECs.**

618 Human airway epithelial cell cultures were inoculated with 32 HAU of ICV and IDV after which the  
619 transcriptional host response was quantified for Type I and III interferon (IFN) (**A,B**) and Interferon  
620 Stimulated Genes (ISG) mRNA-transcripts (**C, D**) at 18, 36, 48 and 72 hours post-inoculation using the  
621  $\Delta\Delta$ Ct-method (44). The results are displayed as means and SD from three technical replicates from  
622 three independent donors.

623

624

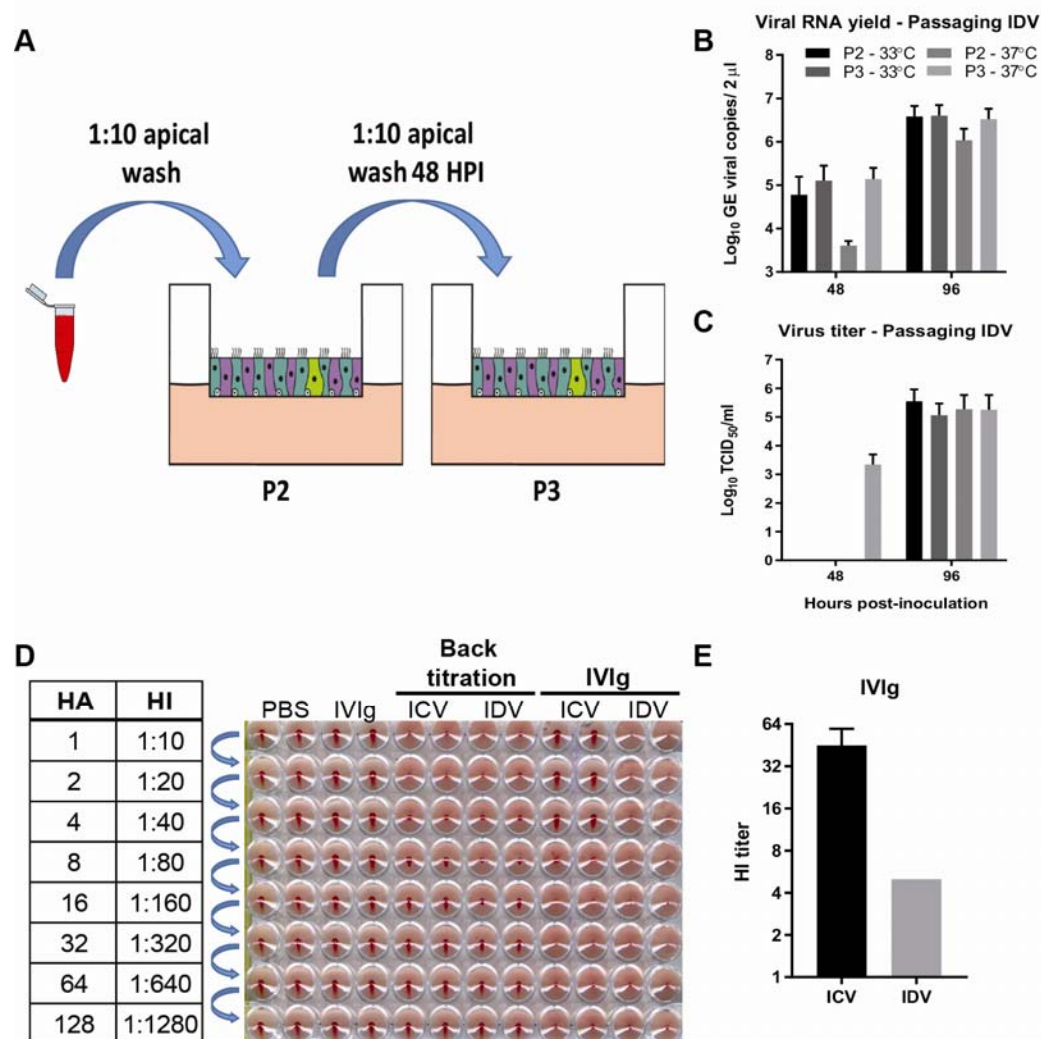

625

626 **Figure 4. Sequential propagation and seroprevalence of IDV.**

627 Human airway epithelial cell cultures were inoculated with tenfold-diluted apical wash and sequentially  
 628 propagated upon new hAEC cultures to assess whether IDV viral progeny is replication competent and  
 629 can be sub-passaged (A). The monitored viral RNA yield is given as genomic equivalents (GE) per 2  
 630 µL of isolated RNA (y-axis) at indicated hours post-inoculation (x-axis) for each of the conditions (B).  
 631 Whereas the viral titer is given as TCID<sub>50</sub>/mL (y-axis) for each condition, at indicated hours post-  
 632 inoculation (x-axis) (C). The results are displayed as means and SD from duplicates from three  
 633 independent donors. A cross-sectional survey was performed using 8 hemagglutination units of virus  
 634 antigen in combination with intravenous immunoglobulins (IVIg) in a hemagglutination inhibition (HI)  
 635 assay to detect ICV- and IDV-directed antibodies among the general population (D). The HI-titer was  
 636 calculated and displayed as mean HI-titer (E). Results are displayed as means and SD from duplicates  
 637 from four independent experiments.
